# Supplementary material for: Stromal Cell Subsets Directing Neonatal Spleen Regeneration
Source: PubMed Central journal article supplement (PMC5220291; doi:10.1038/srep40401), 2017-01-09
Supplement: srep40401-s1.pdf [file srep40401-s1.pdf]

**Title: Stromal Cell Subsets Directing Neonatal Spleen Regeneration**

**Authors:** Jonathan K.H. Tan and Takeshi Watanabe

**SUPPLEMENTAL INFORMATION**

Supplemental Tables 1-4

Supplemental Figure 1

**Table S1. Marker expression profile of neonatal spleen stromal cell subsets**

n.d., not determined

|               | <b>FRC</b> | <b>MRC</b> | <b>RP stroma</b> | <b>RP sinusoids</b> | <b>CA</b> |
|---------------|------------|------------|------------------|---------------------|-----------|
| CD45          | -          | -          | -                | -                   | -         |
| gp38          | +          | -          | -                | -                   | -         |
| MAdCAM-1      | -          | +          | -                | n.d.                | -         |
| CD31          | -          | +          | n.d.             | -                   | +         |
| VE-Cadherin   | -          | +          | n.d.             | -                   | +         |
| VCAM-1        | lo         | hi         | -                | n.d.                | n.d.      |
| ICAM-1        | +          | hi         | n.d.             | n.d.                | n.d.      |
| MECA-32       | -          | -          | n.d.             | n.d.                | +         |
| PDGFR $\beta$ | -          | -          | n.d.             | n.d.                | n.d.      |
| F4/80         | lo         | lo         | +                | -                   | n.d.      |
| CD105         | -/+        | +          | -                | +                   | +         |
| CD201         | +          | +          | n.d.             | -                   | +         |
| CD11b         | n.d.       | n.d.       | -                | n.d.                | n.d.      |
| FSC           | hi         | hi         | lo               | lo                  | hi        |

**Table S2. Primary antibodies used for cell surface marker binding**

| <b>Antibody</b>                       | <b>Alternative Name</b> | <b>Clone</b> | <b>Conjugate(s)</b> | <b>Source</b> |
|---------------------------------------|-------------------------|--------------|---------------------|---------------|
| Rat anti-CD5                          |                         | 53-7.3       | Biotin              | BD Pharmingen |
| Rat anti-CD11b                        |                         | M1/70        | Alexa Fluor 647     | BD Pharmingen |
|                                       |                         |              | Biotin              | eBioscience   |
|                                       |                         |              | PECy7               |               |
| Rat anti-CD16/32                      | Fc Block                | 2.4G2        | Unconjugated        | BD Pharmingen |
|                                       |                         | 93           |                     | BioLegend     |
| Rat anti-CD21/35                      | CR2/CR1                 | 7G6          | PE                  | BD Pharmingen |
| Rat anti-CD31                         | PECAM-1                 | 390          | Biotin              | eBioscience   |
|                                       |                         |              | PE                  |               |
|                                       |                         |              | Unconjugated        | BioLegend     |
| Rat anti-CD45                         |                         | 30-F11       | APC eFluor 780      | eBioscience   |
|                                       |                         |              | Biotin              |               |
| Rat anti-CD54                         | ICAM-1                  | YN1/1.7.4    | PE                  | eBioscience   |
| Rat anti-CD90.2                       |                         | 30-H12       | Alexa Fluor 488     | BioLegend     |
| Rat anti-CD105                        |                         | MJ7/18       | Biotin              | eBioscience   |
|                                       |                         |              | PE                  |               |
| Rat anti-CD106                        | VCAM-1                  | 429          | PE                  | BioLegend     |
| Rat anti-CD140b                       | PDGFR $\beta$           | APB5         | Biotin              | eBioscience   |
|                                       |                         |              | PE                  |               |
|                                       |                         |              | APC                 |               |
| Rat anti-CD144                        | VE-Cadherin             | 11D4.1       | Unconjugated        | BD Pharmingen |
| Rat anti-CD201                        | EPCR                    | eBio1560     | Biotin              | eBioscience   |
|                                       |                         |              | PE                  |               |
| Rat anti-CD254                        | TRANCE                  | IK22/5       | PE                  | eBioscience   |
| Rat anti-B220                         |                         | RA3-6B2      | Alexa Fluor 488     | eBioscience   |
|                                       |                         |              | Alexa Fluor 647     | BioLegend     |
|                                       |                         |              | PE                  | BD Pharmingen |
| Rat anti-ER-TR7                       |                         | ER-TR7       | Unconjugated        | Santa Cruz    |
| Rat anti-F4/80                        |                         | BM8          | Biotin              | eBioscience   |
|                                       |                         |              | PE                  |               |
| Rat anti-FDC-M1                       |                         | FDC-M1       | Unconjugated        | BD Pharmingen |
| Hamster anti-gp38                     | Podoplanin              | eBio8.1.1    | Biotin              | eBioscience   |
|                                       |                         |              | PE                  |               |
|                                       |                         |              | Unconjugated        | AngioBio Co.  |
| Rat anti-Ly6G                         |                         | 1A8          | Biotin              | BioLegend     |
| Rat anti-MAdCAM-1                     |                         | MECA-367     | Alexa Fluor 488     | BioLegend     |
|                                       |                         |              | Biotin              | eBioscience   |
|                                       |                         |              | Unconjugated        | BD Pharmingen |
| Rat anti-MECA-32                      |                         | MECA-32      | Alexa Fluor 488     | BioLegend     |
|                                       |                         |              | PE                  | Santa Cruz    |
| Rat IgG2 <sub>a</sub> Isotype control |                         | eBR2a        | APC                 | eBioscience   |
|                                       |                         |              | Biotin              |               |
|                                       |                         | R35-95       | PE                  | BD Pharmingen |
|                                       |                         |              | Unconjugated        |               |
| Rat IgG2 <sub>b</sub> Isotype control |                         | eB149-10H5   | Biotin              | eBioscience   |
|                                       |                         | A95-1        | FITC                | BD Pharmingen |
|                                       |                         |              | PE                  |               |
|                                       |                         | eB149-10H5   | PECy7               | eBioscience   |

**Table S3. Secondary reagents used for flow cytometry and immunofluorescence staining**

| <b>Antibody</b>   | <b>Conjugate(s)</b>                             | <b>Source</b>                                                           |
|-------------------|-------------------------------------------------|-------------------------------------------------------------------------|
| Donkey anti-rat   | Alexa Fluor 488<br>Alexa Fluor 594              | Molecular Probes                                                        |
| Goat anti-hamster | Alexa Fluor 594                                 | Molecular Probes                                                        |
| Goat anti-rat     | Alexa Fluor 647                                 | Molecular Probes                                                        |
| Streptavidin      | APC<br>DyLight 488<br>eFluor 450<br>PE<br>PECy7 | BD Pharmingen<br>BioLegend<br>eBioscience<br>BD Pharmingen<br>BioLegend |

**Table S4. Quantitative real time PCR primer sequences**

| <b>Genes</b>                    | <b>Forward Sequence</b>    | <b>Reverse Sequence</b>  |
|---------------------------------|----------------------------|--------------------------|
| <i><math>\beta</math>-actin</i> | catcgcgtaaagacctctatgccaac | atggagccaccgatccaca      |
| <i>Rank</i>                     | gctggctaccactggaactc       | gtgcagttggtccaagggtt     |
| <i>RankL</i>                    | atcaggtgtccaacccttc        | tgctaatgtccacgaaatg      |
| <i>Sdf1</i>                     | gctctgcatcagtgacggta       | gggcagcctttctcttctc      |
| <i>CXCL13</i>                   | tcgtgccaaatggttacaaa       | acaaggatgtgggttggtta     |
| <i>TNF<math>\alpha</math></i>   | cgatgggtgtaccttctc         | cggactccgcaaagtctaag     |
| <i>TNFR1</i>                    | accaagtgccacaaaggaac       | cacgcactggaagtgtgtc      |
| <i>LTa</i>                      | tccactccctcagaagcact       | agagaagccatgtcggagaa     |
| <i>LTBR</i>                     | gccgaggtcacagatgaaat       | caggacactggtgaagagca     |
| <i>PDGFRb</i>                   | ccggaacaaacacaccttct       | tagctgggggactcaatgtc     |
| <i>Ng2</i>                      | gatccacctgcatcatctt        | gttcccgcagggaaaactca     |
| <i>RelB</i>                     | ccgtacctggtcatcacagag      | cagtctcgaagctcgtatggc    |
| <i>ICAM1</i>                    | actgcttggggaactggac        | aggcatggcacacgtatgta     |
| <i>Nkx2.5</i>                   | aaagacctcgggcgata          | ccatccgtctcggctttgt      |
| <i>Pecam</i>                    | caacagagccagcagtataggac    | ctgcaactattaaggtggcgatga |
| <i>Madcam</i>                   | cctctgctgagccctacatc       | cttgtggtaggtgccaggt      |
| <i>LYVE1</i>                    | cagcacactagcctggtgta       | cgcccatgattctgcatgtaga   |
| <i>HOX11</i>                    | aagaagaagccgcgcacatc       | ggagtcgtcagaccacggct     |

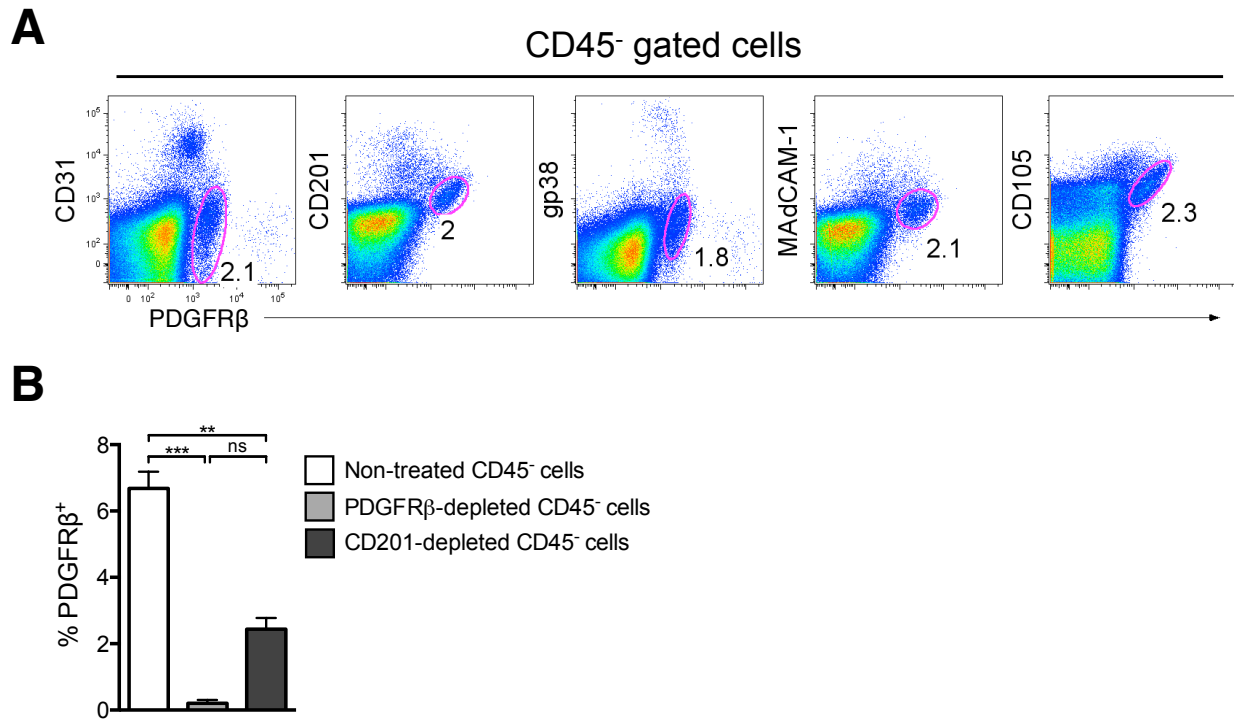

**Figure S1. Cell marker analysis of spleen PDGFRβ<sup>+</sup> cells.** (A) Neonatal spleen stromal tissue was digested into a single-cell suspension and CD45<sup>-</sup> gated cells assessed by 2-marker flow cytometry against PDGFRβ expression. Data are representative of three independent experiments. (B) Percent PDGFRβ<sup>+</sup> cells amongst CD45<sup>-</sup> gated neonatal stromal cell preparations magnetically depleted with PDGFRβ or CD201 antibodies. Error bars indicate SEM. \*\*\* P<0.0001, \*\* P<0.001; one-way ANOVA with Tukey's *post hoc* test.
